# Supplementary material for: Understanding the influence of Bi/Sb substitution on carrier concentration in Mg3Sb2-based materials: decreasing bandgap enhances the degree of impurity ionization
Source: Royal Society of Chemistry journal article supplement (doi:10.1039/d2cp04314a), 2022-01-01
Supplement: d2cp04314a1.pdf [file d2cp04314a1.pdf]

Supporting Information

**Understanding the influence of Bi/Sb substitution on carrier concentration in Mg<sub>3</sub>Sb<sub>2</sub>-based materials: Decreasing bandgap enhances the degree of impurity ionization**

Juan Li,<sup>a</sup> Fei Jia,<sup>b,\*\*</sup> Kai Han,<sup>a</sup> Bing Sun,<sup>a</sup> Lianzhen Cao,<sup>a</sup> Yingde Li<sup>a</sup> and Shuai Zhang<sup>a,\*</sup>

<sup>a</sup> *School of Physics and Electronic Information, Weifang University, Weifang 261061, China*

<sup>b</sup> *Center for Advanced Materials Research, Advanced Institute of Natural Sciences, Beijing Normal University, Zhuhai 519087, China*

## Supplementary Table

**Table S1** The sample density ( $d$ ) of  $\text{Mg}_{3.175}\text{Mn}_{0.025}\text{Sb}_{1.96-x}\text{Bi}_x\text{Te}_{0.04}$  measured by Archimedes method.

| Samples  | Density ( $\text{g}/\text{cm}^3$ ) | Relative density (%) |
|----------|------------------------------------|----------------------|
| $x=0.48$ | 4.4                                | 97%                  |
| $x=1.2$  | 5.03                               | 95%                  |
| $x=1.44$ | 5.28                               | 93%                  |

## Supplementary Figure

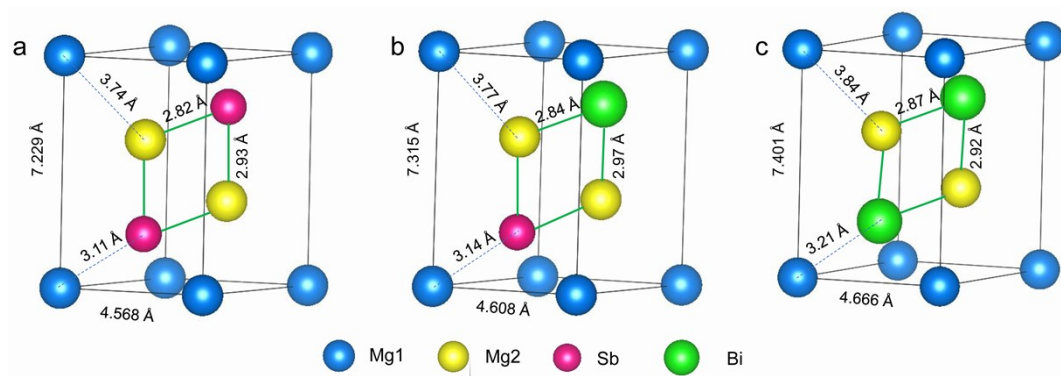

**Fig. S1** The optimized crystal structures of  $\text{Mg}_3\text{Sb}_{2-x}\text{Bi}_x$  ( $x=0, 1$  and  $2$ ).
